# Supplementary material
Source: PubMed Central journal article supplement (PMC5512301)
Supplement: Supp_Fig1.pdf [file Supp_Fig1.pdf]

## Supplementary Data

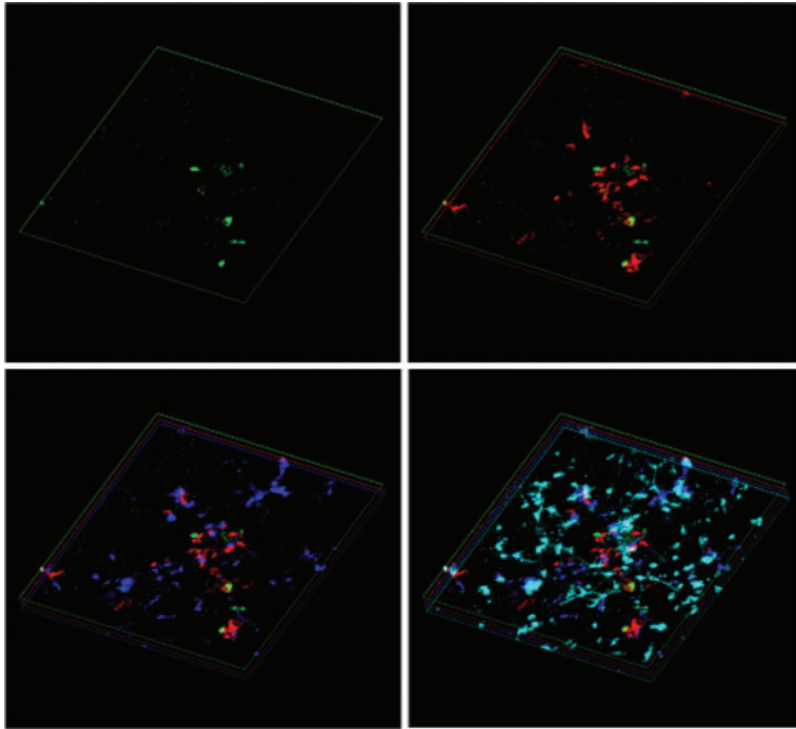

**SUPPLEMENTARY FIG. S1.** Representative three-dimensional (3D) OPC image. Each *layer* (different color of OPCs) is displayed at intervals of 30  $\mu\text{m}$  from *top* to *bottom* from consecutive cross-section images (PDGF-R $\alpha$  staining on day 3) of our OPCs. OPC, oligodendrocyte precursor cell; PDGF-R $\alpha$ , platelet-derived growth factor receptor  $\alpha$ .
