# Supplementary material
Source: PubMed Central journal article supplement (PMC5512301)
Supplement: Supp_Fig2.pdf [file Supp_Fig2.pdf]

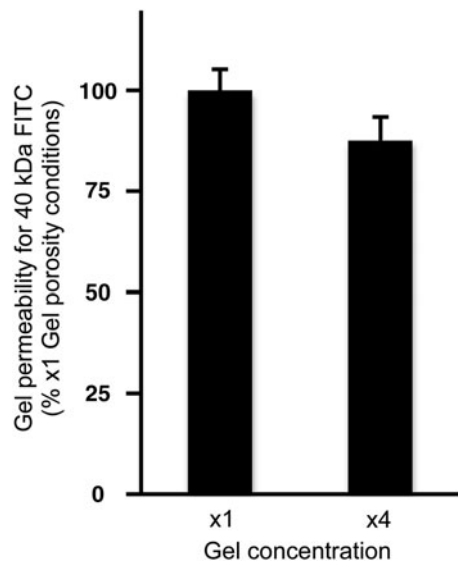

**SUPPLEMENTARY FIG. S2.** The permeability of FITC-dextran (40 kDa) for the hydrogel was similar between the x1 and x4 gel concentration conditions, indicating that regardless of gel concentration, cells would receive sufficient nutrients from culture media in our 3D culture system.  $N=3$ , mean  $\pm$  SD. SD, standard deviation.
