# Supplementary material
Source: PubMed Central journal article supplement (PMC5512301)
Supplement: Supp_Fig3.pdf [file Supp_Fig3.pdf]

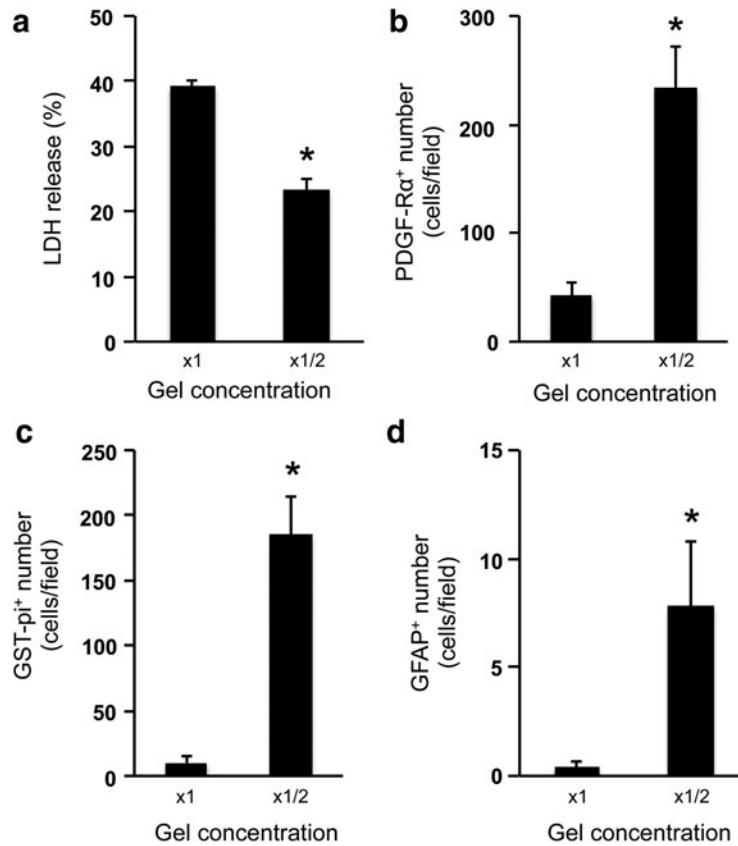

**SUPPLEMENTARY FIG. S3.** OPCs (900 cells/mL) were seeded in the gel of x1/2 gel concentration conditions, and 3 days later, cells were subjected to LDH assay. In addition, ICC experiments with anti-PDGF-R $\alpha$ , anti-GST-pi, or anti-GFAP antibodies were conducted on day 3 for PDGF-R $\alpha$  staining or day 10 for GST-pi or GFAP staining. **(a)** Even in the lower seeding cell number conditions, decreasing gel concentration (e.g., gel viscosity) improved OPC survival. \* $P < 0.01$  of  $N = 3-4$ , mean  $\pm$  SD. **(b-d)** Concomitantly, the lower gel concentration conditions increased the numbers of OPCs **(b)**, oligodendrocytes **(c)**, and astrocytes **(d)**. \* $P < 0.01$  of  $N = 4-6$ , mean  $\pm$  SD. LDH, lactate dehydrogenase.
